# Supplementary material
Source: Springer Nature journal article supplement (https://www.springermedizin.de/resource/supplementary/13049_2013_714_MOESM3_ESM.pdf/9666954)
Supplement: MOESM3 [file 9666954]

**Table 2: Reviewed articles for jugular vein dimension and intracranial pressure (ICP)**

| Reference                           | Country   | Article Type & Subjects    | Observations Measurements                                        | Key Findings                                                                                                                           | Weaknesses                                                                                                                           |
|-------------------------------------|-----------|----------------------------|------------------------------------------------------------------|----------------------------------------------------------------------------------------------------------------------------------------|--------------------------------------------------------------------------------------------------------------------------------------|
| Craig et al., 1991 <sup>25</sup>    | UK        | Case review:<br>2 patients | Intracranial pressure and collar use                             | Collar use was associated with impaired venous drainage and as such relates to an increase in ICP                                      | Only two patients                                                                                                                    |
| Lemyze et al., 2011 <sup>28</sup>   | France    | Case review:<br>1 patient  | Level of consciousness                                           | Collar use post hanging may exacerbate cerebral oedema due to compression of neck veins                                                | Only one patient                                                                                                                     |
| Dunham et al., 2008 <sup>32</sup>   | USA       | Literature Review          | Risks with MRI and collar use                                    | Collar use is associated with a rise in ICP, and secondary brain injury; early collar removal advocated                                | Evidence supports the theory but no substantial proof                                                                                |
| Ho et al., 2002 <sup>7</sup>        | China     | Literature Review          | Intracranial pressure and collar use                             | Collars appear to act like a tourniquet around the neck, potentially exacerbating a head injury and increasing ICP                     | Evidence supports the theory but no substantial proof                                                                                |
| Dunham et al., 2011 <sup>8</sup>    | USA       | Simulation study           | Collar use and outcome                                           | Early collar removal is advocated for unstable/high risk and stable patients with spinal injuries                                      | Simulation study only; no real proof for claims                                                                                      |
| Davies et al., 1996 <sup>5</sup>    | UK        | Study:<br>19 patients      | ICP before and after collar application                          | Stifneck collar may cause a rise in intracranial pressure.                                                                             | Supports hypothesis for collars affecting ICP but exact mechanism for rise in ICP was not determined                                 |
| Hunt et al., 2001 <sup>29</sup>     | UK        | Study:<br>30 patients      | ICP before and after collar application                          | Collars are associated with a rise in intracranial pressure, potentially worse if the ICP is higher to start with                      | Supports hypothesis for collars affecting ICP but exact mechanism for rise in ICP was not determined                                 |
| Kolb et al., 1999 <sup>34</sup>     | USA       | Study:<br>20 patients      | Cerebrospinal fluid pressure before and after collar application | Cerebrospinal fluid pressure increased after collar application, but no clear associated with BMI                                      | Collars were placed when the patient was inclined to the side rather than supine; exact mechanism for rise in ICP was not determined |
| Kuhnigk et al., 1993 <sup>30</sup>  | Germany   | Study:<br>18 patients      | Intracranial pressure and collar use                             | Found no correlation between collar use and increased intracranial pressure                                                            | Baseline ICP readings were higher than in other reports and as such may have had an impact on the results                            |
| Mobbs et al., 2002 <sup>9</sup>     | Australia | Study:<br>10 patients      | ICP before and after collar application                          | Intracranial pressure was higher following the application of a collar                                                                 | Supports hypothesis for collars affecting ICP but exact mechanism for rise in ICP was not determined                                 |
| Stone et al., 2010 <sup>31</sup>    | USA       | Study:<br>42 volunteers    | Jugular vein dimensions before and after collar application      | Collar application associated with alteration to jugular vein diameter indicative of venous obstruction                                | Supports hypothesis for collars affecting ICP but no mechanism was determined as actual ICP was not measured                         |
| Porter et al., 1999 <sup>27</sup>   | UK        | Study:<br>9 patients       | ICP before and after collar application                          | All patients showed a rise in ICP following collar application                                                                         | Supports hypothesis for collars affecting ICP but no mechanism was determined                                                        |
| Ferguson et al., 1993 <sup>10</sup> | UK        | Study:<br>5 patients       | Tissue Interface Pressure around neck area                       | Normal jugular venous pressure when supine was 2-7mmHg, concluded pressures exerted on the neck over this will cause a 'back pressure' | Supposition rather than fact with the relationship of collar use to increased ICP                                                    |
| Raphael et al., 1994 <sup>26</sup>  | UK        | Study:<br>9 patients       | Cerebrospinal fluid pressure before and after collar application | 7/9 experienced raised cerebrospinal fluid pressure following collar application                                                       | Supports hypothesis for collars affecting ICP but no mechanism was determined                                                        |
